# Supplementary material
Source: Springer Nature journal article supplement (https://www.springerprofessional.de/resource/supplementary/13638_2013_1051_MOESM4_ESM.pdf/11898834)

Routing Port

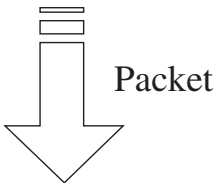

Destination Channel  
Query

Time Stamp  
Assignment

Packet Queuing

Data Delivery

For MR-MC Architecture

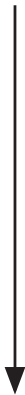

Supplement: MOESM4 [file 11898834]
